# Supplementary material for: Maternal Microchimerism: Increased in the Insulin Positive Compartment of Type 1 Diabetes Pancreas but Not in Infiltrating Immune Cells or Replicating Islet Cells
Source: PubMed Central journal article supplement (PMC3909047; doi:10.1371/journal.pone.0086985), 2014-01-31

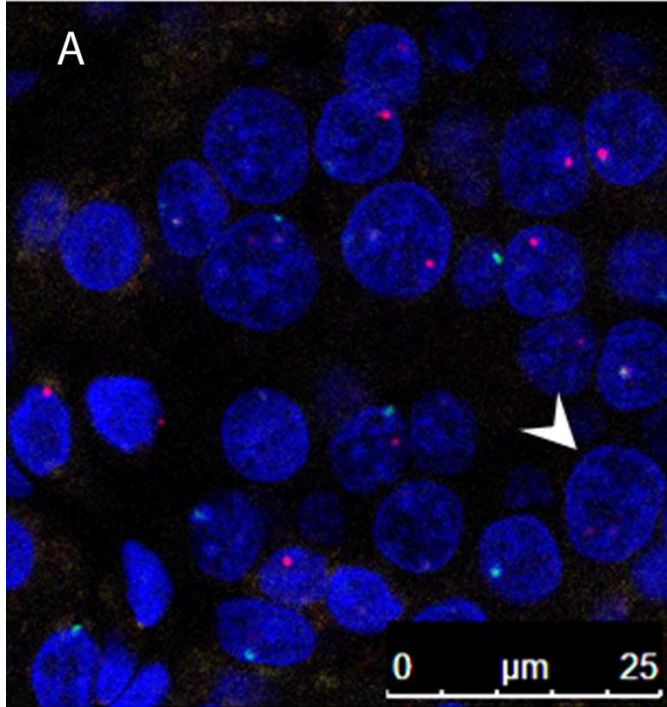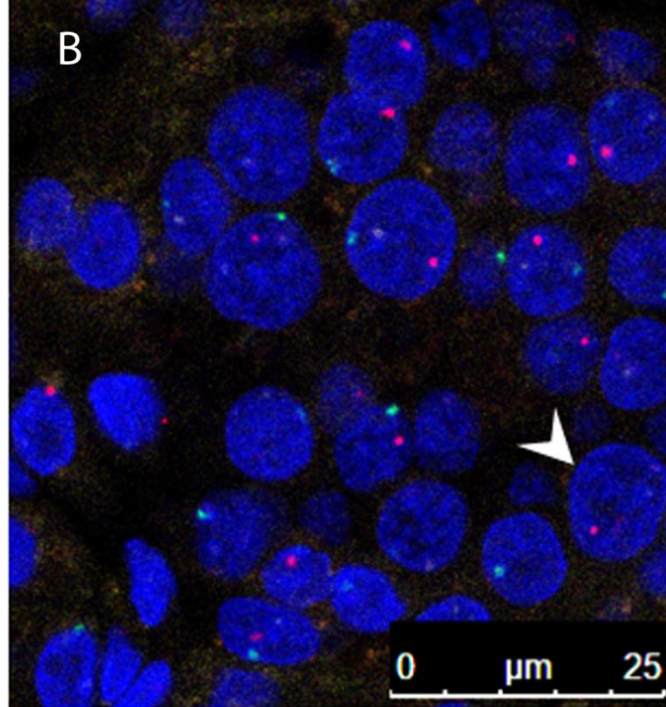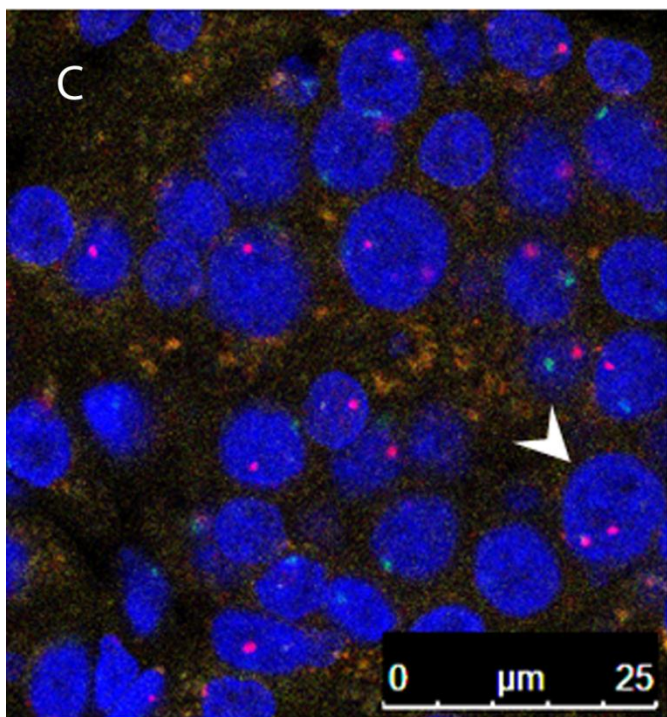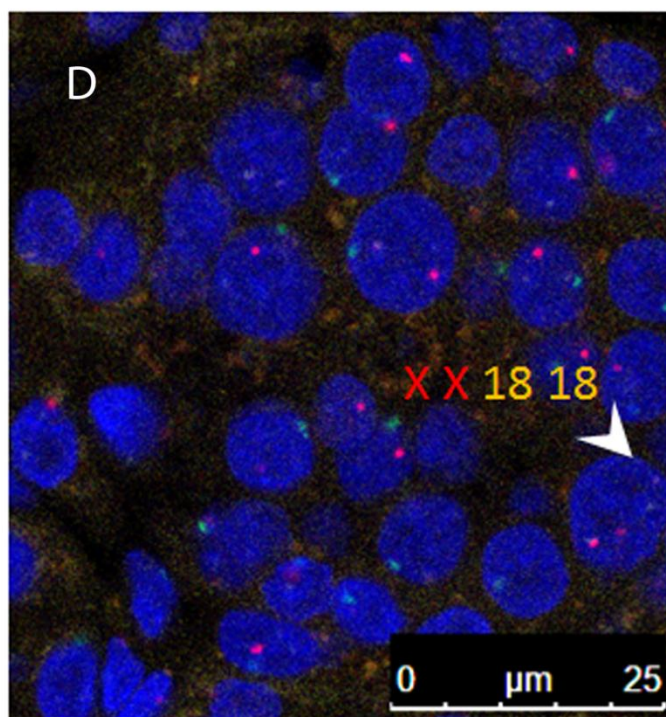

Supplement: pone.0086985.s001.pdf [file pone.0086985.s001.pdf]
